# Supplementary material for: Saturated Iso-Type Fatty Acids from the Marine Bacterium Mesoflavibacter zeaxanthinifaciens with Anti-Trypanosomal Potential
Source: MDPI journal article supplement (doi:10.3390/ph17040499), 2024-04-13
Supplement: s1 [file s1]

## SUPPLEMENTARY MATERIAL

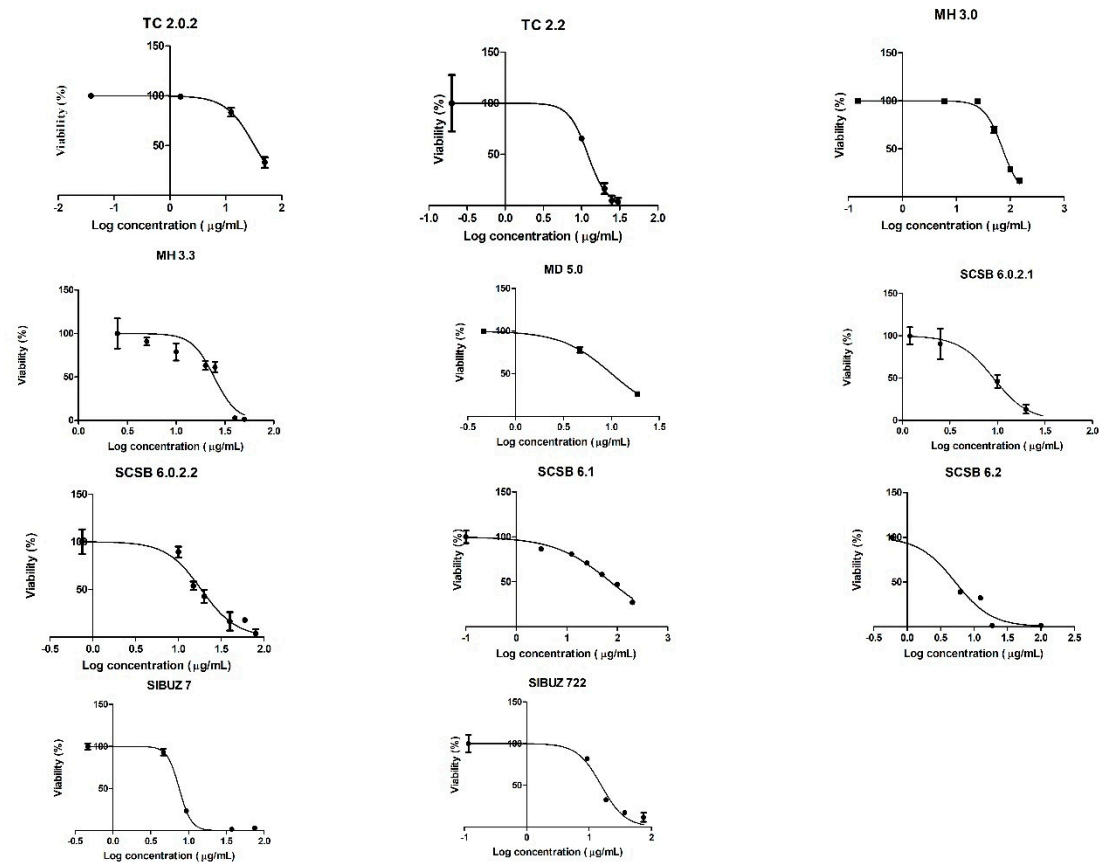

**Figure S1**-Dose-response curves of microbial metabolites against *T. cruzi* trypomastigotes. TC (*Tubastraea coccinea*), MH (*Mussismilia hispida*), MD (*Madracis decactis*), SCSB (Sediments of the São Sebastião Channel), SIBUZ (Sediments of Buzios Island).

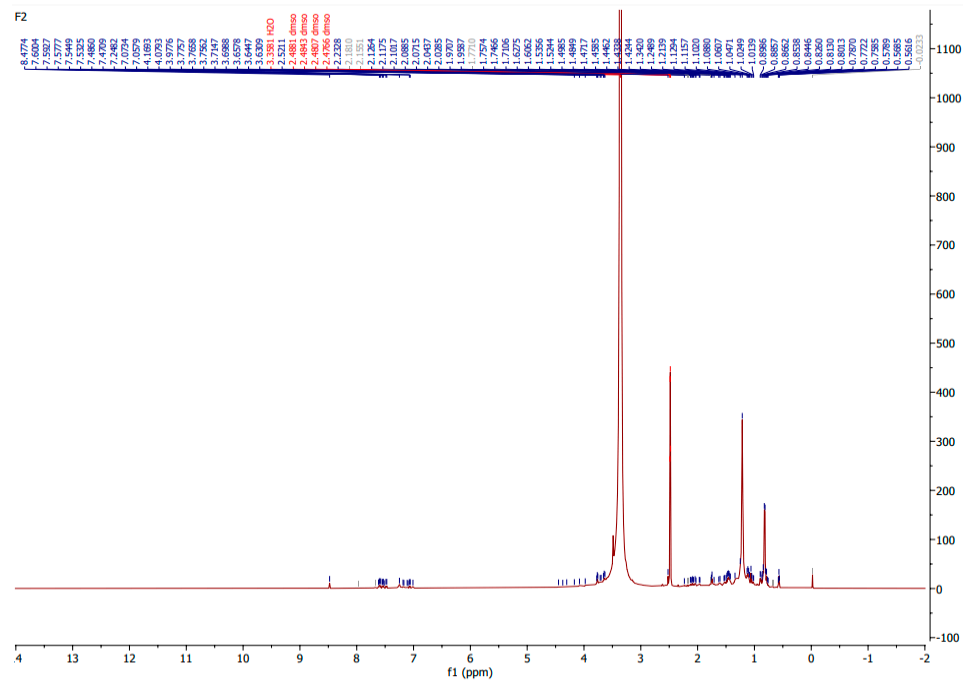

Figure S2 A– NMR  $^1\text{H}$  spectrum of fraction II from *M. zeaxanthinifaciens* EtOAc extract (FII).

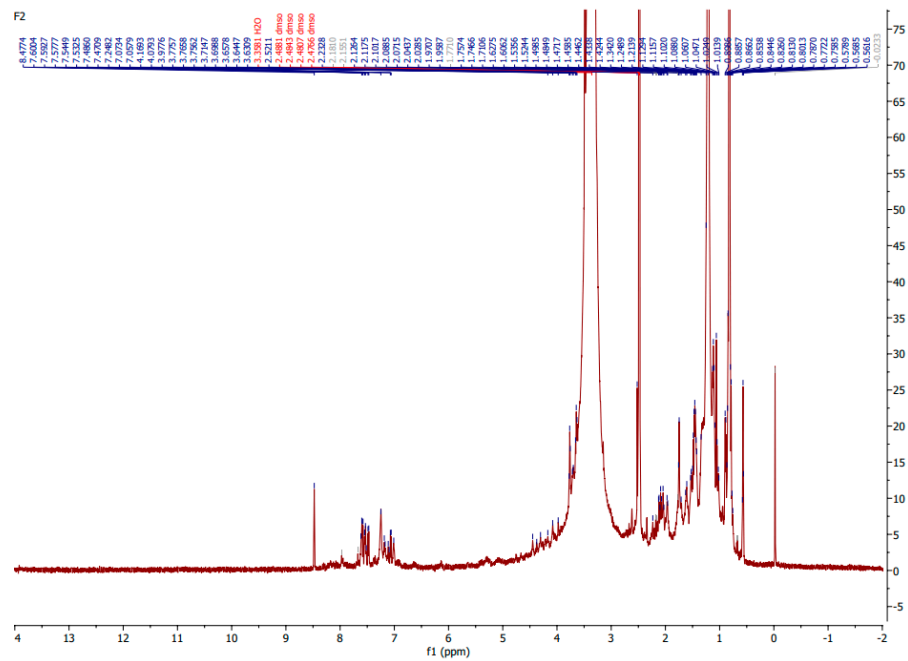

Figure S2 B – NMR  $^1\text{H}$  spectrum of fraction II from *M. zeaxanthinifaciens* EtOAc extract (FII).

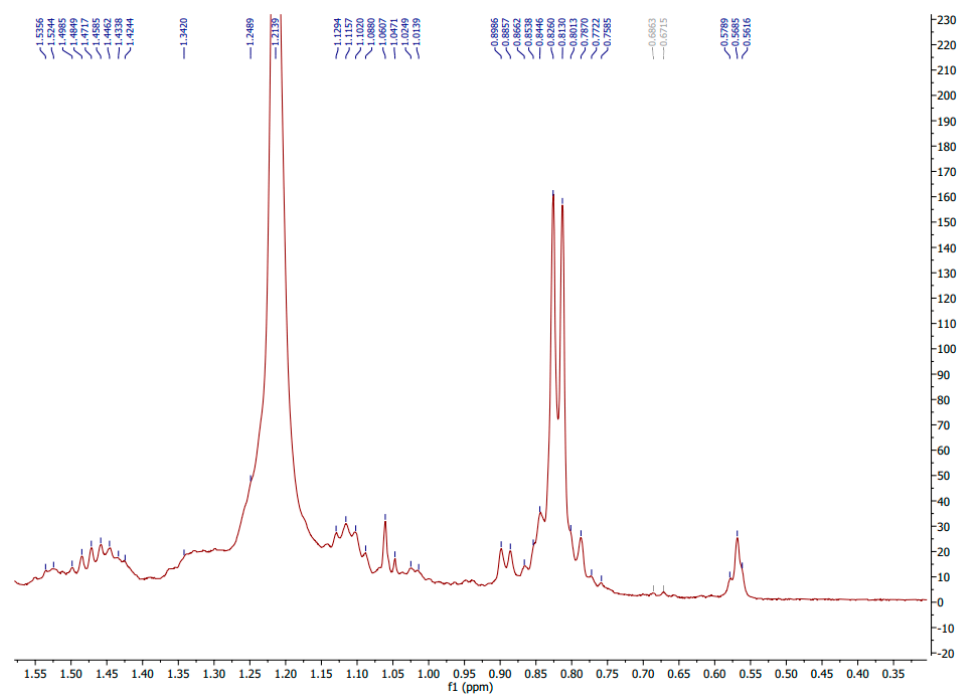

Figure S2 C– NMR  $^1\text{H}$  spectrum of fraction II from *M. zeaxanthinifaciens* EtOAc extract (FII).

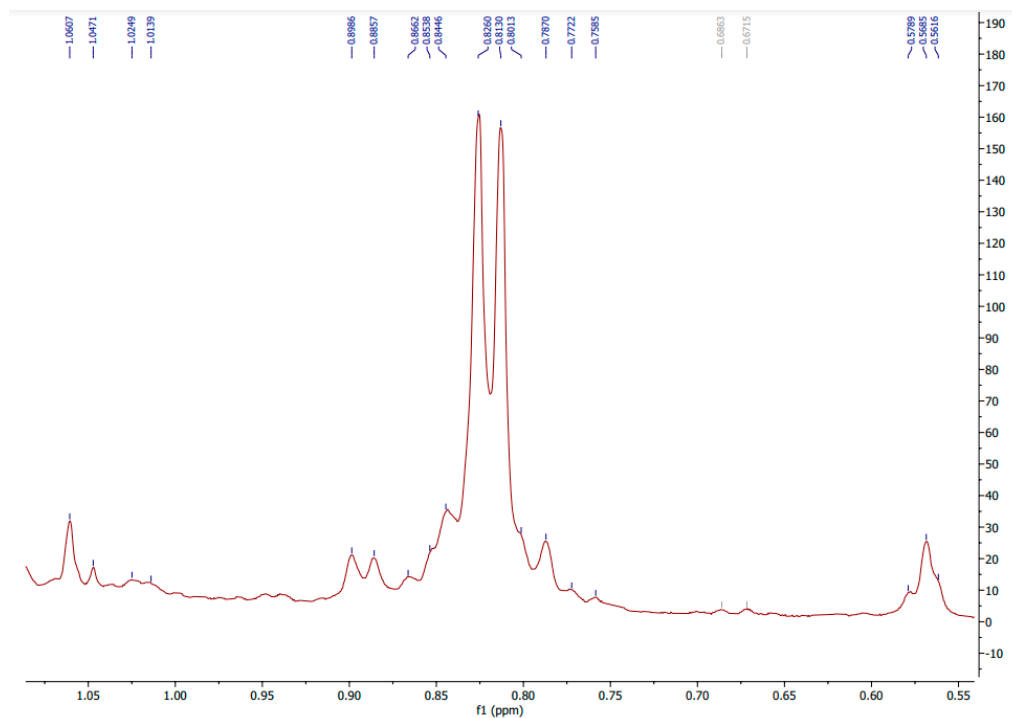

Figure S2 D– NMR  $^1\text{H}$  spectrum of fraction II from *M. zeaxanthinifaciens* EtOAc extract (FII).

**Table S1-** Protein signals (m/z) in MALDI-TOF/MS of trypomastigotes of *T. cruzi* in the presence of fraction II from *M. zeaxanthinifaciens* EtOAc extract (FII). Trypomastigotes were treated with FII at 25 and 50  $\mu\text{g/mL}$ , and benznidazole (BZN-40  $\mu\text{M}$ ) was used as standard drug. Parasites without treatment were used as control (untreated). The parasites were treated for 24 h and the protein profile was compared to untreated parasites.

| BZN 40 $\mu$ M |      |         |       | FII 25 $\mu$ g/mL |      |         |       | FII 50 $\mu$ g/mL |      |         |       | Control  |      |         |       |
|----------------|------|---------|-------|-------------------|------|---------|-------|-------------------|------|---------|-------|----------|------|---------|-------|
| m/z            | Res. | Intens. | Area  | m/z               | Res. | Intens. | Area  | m/z               | Res. | Intens. | Area  | m/z      | Res. | Intens. | Area  |
| 2664,075       | 1066 | 2519    | 5613  | 2015,834          | 743  | 2075    | 4187  | 2691,17           | 904  | 4531    | 10087 | 2015,135 | 642  | 2350    | 4703  |
| 2682,109       | 1386 | 2118    | 3449  | 2056,46           | 845  | 4410    | 11809 | 2781,908          | 694  | 4287    | 11698 | 2055,506 | 673  | 4897    | 15525 |
| 2690,333       | 672  | 3805    | 13954 | 2063,342          | 690  | 1764    | 3954  | 3483,932          | 1095 | 4161    | 7632  | 2068,946 | 581  | 2273    | 6339  |
| 2699,407       | 1014 | 2970    | 7126  | 2070,153          | 913  | 2027    | 4642  | 3577,487          | 497  | 4478    | 10515 | 2335,717 | 594  | 3180    | 10503 |
| 2781,947       | 729  | 2214    | 4701  | 2327,608          | 540  | 1871    | 4262  | 3613,278          | 583  | 4274    | 11884 | 2689,354 | 1349 | 2573    | 4436  |
| 3578,838       | 819  | 3309    | 11560 | 2336,717          | 567  | 2824    | 9740  | 3627,547          | 686  | 4440    | 11838 | 2696,163 | 525  | 2381    | 7139  |
| 3979,141       | 654  | 2850    | 14765 | 2690,359          | 1170 | 2586    | 5468  | 3977,528          | 852  | 8587    | 41946 | 2780,356 | 580  | 6699    | 32802 |
| 3984,344       | 1677 | 2485    | 6411  | 2698,036          | 599  | 2530    | 9427  | 3998,382          | 1121 | 6298    | 25167 | 2896,711 | 577  | 3940    | 17374 |
| 3997,886       | 838  | 7370    | 53474 | 2781,729          | 588  | 6872    | 32379 | 4006,558          | 2883 | 4686    | 5541  | 2966,007 | 748  | 2967    | 8942  |
| 4011,094       | 1096 | 4074    | 24163 | 2898,119          | 564  | 3458    | 16230 | 4009,553          | 2241 | 4814    | 6482  | 3173,896 | 745  | 2659    | 6899  |
| 4024,91        | 895  | 4605    | 29836 | 2966,813          | 542  | 2100    | 7688  | 4013,901          | 2809 | 4880    | 8414  | 3577,343 | 630  | 5032    | 23540 |
| 4038,159       | 808  | 13807   | 86745 | 3175,138          | 904  | 1891    | 3974  | 4023,769          | 772  | 5766    | 21999 | 3771,764 | 597  | 4507    | 20408 |
| 4052,022       | 699  | 6394    | 50155 | 3578,712          | 762  | 3907    | 14653 | 4038,211          | 904  | 14855   | 76509 | 3947,291 | 660  | 4561    | 23072 |
| 4063,586       | 3257 | 3165    | 7429  | 3599,472          | 775  | 2401    | 6816  | 4052,234          | 1359 | 7104    | 33371 | 3956,013 | 1666 | 2427    | 3751  |
| 4070,523       | 1075 | 2802    | 9824  | 3773,812          | 761  | 5251    | 24416 | 4068,325          | 999  | 5311    | 18122 | 3961,779 | 1572 | 2555    | 5176  |
| 4078,051       | 755  | 3374    | 26298 | 3948,816          | 682  | 3895    | 20333 | 4077,888          | 3275 | 4525    | 7379  | 3975,89  | 750  | 15257   | 92591 |
| 4090,429       | 2793 | 2669    | 5838  | 3960,786          | 1146 | 2151    | 5822  | 4087,562          | 1229 | 4398    | 9575  | 3987,679 | 1267 | 2835    | 4551  |
| 4101,786       | 2362 | 2408    | 6320  | 3977,658          | 737  | 15163   | 95745 | 4117,196          | 793  | 6537    | 31489 | 3997,246 | 901  | 4335    | 27493 |
| 4112,01        | 862  | 2197    | 6445  | 3999,67           | 856  | 4262    | 20001 | 5656,149          | 792  | 2999    | 7757  | 4004,478 | 1633 | 3411    | 8242  |
| 4116,162       | 1118 | 2699    | 9873  | 4006,182          | 922  | 3398    | 17659 | 6143,043          | 865  | 2837    | 16054 | 4010,492 | 1162 | 3280    | 9356  |

|          |      |       |        |          |      |       |        |          |      |      |       |          |      |       |        |
|----------|------|-------|--------|----------|------|-------|--------|----------|------|------|-------|----------|------|-------|--------|
| 4130,501 | 1105 | 2070  | 5795   | 4017,218 | 1339 | 3262  | 9436   | 6161,906 | 875  | 2670 | 9033  | 4021,161 | 491  | 3291  | 19935  |
| 4401,734 | 723  | 1835  | 4872   | 4023,219 | 1015 | 3803  | 23828  | 6602,605 | 1564 | 2531 | 7102  | 4021,161 | 506  | 3291  | 19935  |
| 4407,563 | 1708 | 1968  | 3065   | 4038,038 | 817  | 12814 | 74765  | 7966,312 | 1102 | 1621 | 7122  | 4036,34  | 733  | 10951 | 74389  |
| 5035,447 | 629  | 1779  | 7855   | 4050,989 | 742  | 5061  | 36149  | 7980,687 | 1165 | 1582 | 6373  | 4050,957 | 792  | 4319  | 27099  |
| 6603,142 | 786  | 2376  | 25165  | 4065,327 | 800  | 3362  | 18127  | 7995,453 | 1025 | 3665 | 31565 | 4063,556 | 1161 | 3597  | 12286  |
| 6622,662 | 1264 | 1546  | 5755   | 4074,106 | 564  | 3244  | 20770  | 8008,324 | 3788 | 1859 | 7294  | 4067,144 | 2727 | 3542  | 6884   |
| 6668,455 | 690  | 1440  | 6961   | 4091,268 | 722  | 2469  | 10014  | 8022,537 | 842  | 2152 | 13304 | 4072,719 | 609  | 4142  | 22853  |
| 6674,031 | 2359 | 1277  | 2303   | 4100,965 | 700  | 2568  | 10380  | 8025,856 | 843  | 2106 | 13304 | 4085,751 | 1461 | 3376  | 9325   |
| 6698,247 | 862  | 1290  | 5423   | 4117,199 | 669  | 15808 | 109194 | 8046,852 | 960  | 2935 | 23453 | 4089,843 | 556  | 3361  | 13147  |
| 6709,741 | 589  | 2052  | 20807  | 4131,566 | 751  | 4679  | 30309  | 8060,908 | 1401 | 2482 | 12419 | 4100,177 | 968  | 3356  | 12341  |
| 6727,793 | 1865 | 1328  | 4336   | 4145,062 | 771  | 6235  | 43857  | 8074,721 | 1099 | 9983 | 93513 | 4115,588 | 704  | 18291 | 132043 |
| 6735,048 | 780  | 1279  | 4454   | 4156,108 | 1600 | 2475  | 4461   | 8088,456 | 1557 | 3400 | 19755 | 4129,801 | 798  | 5572  | 33200  |
| 7954,533 | 1085 | 1086  | 5248   | 4161,836 | 522  | 2337  | 9511   | 8101,083 | 721  | 3701 | 37895 | 4143,516 | 796  | 6462  | 45114  |
| 7968,452 | 1315 | 1753  | 14646  | 4185,037 | 551  | 2070  | 6884   | 8116,38  | 1435 | 2226 | 11907 | 4156,627 | 2711 | 2738  | 5112   |
| 7981,873 | 2625 | 1552  | 6528   | 4399,737 | 606  | 2001  | 6564   | 8125,179 | 3113 | 2016 | 9935  | 4399,958 | 937  | 2366  | 6558   |
| 7995,695 | 1151 | 6660  | 61530  | 5307,851 | 842  | 1601  | 7211   | 8137,872 | 1881 | 1767 | 5941  | 4597,734 | 2856 | 2194  | 4904   |
| 8009,644 | 1568 | 2156  | 13194  | 5435,754 | 571  | 1571  | 8767   | 8146,327 | 4957 | 1689 | 3797  | 5434,395 | 719  | 2441  | 14482  |
| 8024,751 | 1245 | 2869  | 30468  | 5436,844 | 583  | 1638  | 8767   | 8156,47  | 1407 | 1620 | 5447  | 5526,855 | 1088 | 2266  | 12774  |
| 8033,958 | 2369 | 2207  | 9796   | 6505,132 | 1089 | 1245  | 5287   | 8171,721 | 876  | 2199 | 20891 | 5547,229 | 867  | 3100  | 22565  |
| 8046,276 | 1256 | 3499  | 38357  | 6602,089 | 1171 | 2391  | 24599  | 10065,73 | 3366 | 749  | 3033  | 5561,44  | 3342 | 2024  | 4402   |
| 8062,036 | 1616 | 2793  | 14850  | 6709,019 | 1840 | 1265  | 3488   |          |      |      |       | 6130,69  | 1262 | 3077  | 18547  |
| 8075,276 | 1069 | 11741 | 124173 | 7980,3   | 1512 | 868   | 3384   |          |      |      |       | 6137,735 | 1865 | 2601  | 8617   |
| 8088,679 | 1706 | 3856  | 26886  | 7995,48  | 1084 | 2298  | 20130  |          |      |      |       | 6142,914 | 1659 | 2344  | 7341   |
| 8102,604 | 1132 | 4771  | 70224  | 8011,836 | 864  | 1030  | 7340   |          |      |      |       | 6148,784 | 1599 | 2172  | 5678   |
| 8125,648 | 1129 | 2015  | 11388  | 8015,26  | 860  | 1042  | 7340   |          |      |      |       | 6174,786 | 2025 | 1749  | 4143   |
| 8136,189 | 1072 | 1953  | 12847  | 8024,211 | 1275 | 1232  | 7064   |          |      |      |       | 6197,242 | 1354 | 1751  | 5097   |
| 8142,095 | 1703 | 1940  | 9101   | 8036,255 | 1381 | 1130  | 5271   |          |      |      |       | 6599,239 | 883  | 2510  | 20758  |
| 8152,799 | 839  | 1986  | 20633  | 8047,961 | 1097 | 1854  | 16816  |          |      |      |       | 6703,924 | 770  | 2049  | 11681  |

|          |      |      |       |          |      |      |       |
|----------|------|------|-------|----------|------|------|-------|
| 8157,555 | 809  | 1932 | 20633 | 8060,33  | 2059 | 1453 | 6464  |
| 8165,219 | 3272 | 1692 | 6707  | 8075,139 | 965  | 5797 | 59593 |
| 8181,083 | 2050 | 1565 | 9282  | 8089,911 | 963  | 1984 | 15474 |
| 8192,744 | 1351 | 1123 | 6818  | 8101,691 | 959  | 2397 | 23102 |
| 8215,414 | 1094 | 1070 | 5516  | 8113,748 | 1260 | 1253 | 11769 |
| 8225,605 | 2028 | 946  | 3339  | 8131,963 | 4342 | 1006 | 2655  |
| 8241,23  | 805  | 1042 | 8116  | 8148,016 | 5531 | 970  | 3572  |
| 8246,196 | 758  | 988  | 8116  | 8153,875 | 4106 | 894  | 2747  |
| 8261,63  | 965  | 949  | 5386  | 10063,57 | 1037 | 537  | 3623  |
| 10045,72 | 1675 | 561  | 2760  | 13202,43 | 1738 | 512  | 4691  |
| 10056,49 | 3465 | 853  | 4149  | 13220,56 | 4840 | 287  | 1512  |
| 10064,82 | 3387 | 957  | 6353  |          |      |      |       |
| 10074,89 | 2555 | 900  | 5667  |          |      |      |       |
| 10085,55 | 4243 | 624  | 2340  |          |      |      |       |
| 10095,25 | 2230 | 606  | 3042  |          |      |      |       |
| 13199,85 | 1554 | 370  | 4883  |          |      |      |       |
| 13221,16 | 3172 | 315  | 2023  |          |      |      |       |

|          |      |      |       |
|----------|------|------|-------|
| 6712,014 | 772  | 1702 | 7084  |
| 6894,768 | 1364 | 2213 | 13286 |
| 6909,344 | 532  | 2058 | 16285 |
| 7992,107 | 1129 | 1780 | 19647 |
| 8020,221 | 935  | 1242 | 8958  |
| 8045,452 | 874  | 1534 | 13423 |
| 8071,967 | 949  | 4623 | 52911 |
| 8087,243 | 1039 | 1686 | 10977 |
| 8099,025 | 1082 | 1896 | 17291 |
| 10061,43 | 1690 | 712  | 2575  |
| 11051,53 | 1239 | 669  | 6785  |
| 11092,3  | 1197 | 841  | 11463 |
| 12257,4  | 1169 | 658  | 8532  |
| 12270,45 | 5005 | 600  | 2565  |
| 12275,62 | 1931 | 491  | 2791  |
| 12285,04 | 2430 | 500  | 2828  |
| 12299,2  | 3741 | 431  | 1765  |
| 12312,08 | 5862 | 407  | 1942  |
| 13199,45 | 1394 | 510  | 4705  |
| 13789,34 | 2094 | 394  | 3385  |
| 13807,86 | 3978 | 327  | 1678  |
| 13829,91 | 4910 | 314  | 1084  |
| 13839,86 | 1816 | 314  | 1831  |
